# Supplementary material
Source: PubMed Central journal article supplement (PMC3907646)
Supplement: 13197_2011_487_MOESM1_ESM.pdf [file 13197_2011_487_MOESM1_ESM.pdf]

## **Appendix**

### **Optimization of Microwave-Assisted Hot Air Drying Conditions of Okra Using Response Surface Methodology**

This Appendix of supporting information consists of 6 pages, which include details of specific energy calculations, 2 tables and 2 figures as follows:

**Table A1** Specific Energy Consumption in Microwave-Convective Drying of Okra

**Table A2** Color parameter values of okra dried under various drying conditions

**Fig. 6** Microwave heating system

**Fig. 7** Appearance of okra after microwave-convective drying and rehydration

## 1. Specific Energy calculations

Specific energy consumption, energy required to remove unit amount of moisture content was estimated by calculating the energy required by different components of the drying system during microwave-convective drying process (Eqn 1) (Kumar, 2009; Sharma and Prasad 2005; Sharma 2000). Okra was dried from an initial moisture content of about 89% (wet basis) to a desired moisture content of approximately 10% (dry basis).

$$E = \frac{E_1 + E_2 + E_3 + E_4 + E_5}{W_e} \quad (1)$$

where, E = specific energy consumption, MJ/kg;  $E_1$  = energy required to heat the air, MJ;  $E_2$  = energy requirement of the air blower, MJ;  $E_3$  = energy requirement of the microwave generator, MJ;  $E_4$  = energy requirement for turn table, MJ;  $E_5$  = energy requirement of water pump for cooling system of microwave generator, MJ and  $W_e$  = amount of moisture removed, kg.

### 1.1 Energy consumed by heater

The energy demand for heating the air ( $E_1$ ), knowing the drying time was calculated using equation 2.

$$E_1 = \frac{Q_a t}{\eta_h} \quad (2)$$

where,  $Q_a$  = sensible heat gained by ambient air;  $E_1$  = energy demand for heater, kJ,  $t$  = drying time, s;  $\eta_h$  = efficiency of electrical heaters.

Efficiency of electric heater was assumed as 90%.

Sensible heat gained by ambient air to get heated up from initial temperature ( $T_i$ ) to required temperature ( $T_f$ ) was estimated from the following equation (Eqn 3):

$$Q_a = G (1.005 + 1.88w)(T_f - T_i) \quad (3)$$

Where,  $G$  = mass flow rate of air, kg/s;  $w$  = absolute humidity of air, kg of water/ kg of dry air.

Mass flow rate of hot air flowing through the hot air duct was estimated from the following equation (Eqn 4):

$$G = \frac{\pi D_i^2 \rho v}{4} \quad (4)$$

where,  $D_i$  = internal diameter of the air supplying duct, m;  $\rho$  = density of the air, kg/m<sup>3</sup>;  $v$  = velocity of air in duct, m/s.

Dry bulb and wet bulb temperature of the ambient air were measured using a hygrometer and partial pressure of water vapor in the ambient air was estimated from the Carrier's equation (Eqn 5):

$$P_v = P_v' - \frac{(P - P_v')(T - T_w) 1.8}{2800 - 1.3(1.8T + 32)} \quad (5)$$

where,  $T$  = dry bulb temperature of ambient air, °C;  $T_w$  = wet bulb temperature of the ambient air, °C;  $P_v$  = partial pressure of water vapor in ambient air, kPa;  $P_v'$  = partial pressure of water vapor at temperature  $T_w$ , kPa;  $P$  = atmospheric pressure.

Knowing the value of  $P_v$ , the absolute humidity in the air was then estimated by the following equation (Eqn 6):

$$w = 0.622 \frac{P_v}{p - P_v} \quad (6)$$

where,  $w$  = absolute humidity of air, kg of water/ kg of dry air

### 1.2 Energy consumed by blower

An overall efficiency of 70% was assumed for both motor and the blower. Energy demand of the blower,  $E_2$  was calculated using equation 7.

$$E_2 = \frac{P_m t}{\eta_b} \quad (7)$$

where,  $P_m$  = power of the motor, kW;  $t$  = drying time, s;  $\eta_b$  = overall efficiency of the blower and motor.

### 1.3 Energy requirement of microwave generator

Microwave generators are 60-70% efficient in converting the line power to the microwaves as recommended by the manufacturing companies. Further in the drying system, all microwave energy is not absorbed by the product but some microwaves are reflected back. So, overall efficiency of the system reduces to about 50%. Microwave energy demand  $E_3$  was calculated using equation 8.

$$E_3 = \frac{P_{mw} t}{\eta_{mw}} \quad (8)$$

where,  $P_{mw}$  = microwave power applied to the food material, kW;  $t$  = drying time, s;  $\eta_{mw}$  = efficiency of microwave system, 0.5.

### 1.4 Energy requirement of rotating motor

In the present system, there was a system made to rotate the product holder inside the drying chamber (for uniform heating). Energy consumed by the rotating motor  $E_4$  in the system was calculated using equation 9:

$$E_4 = \frac{P_{rm} t}{\eta_{rm}} \quad (9)$$

Where,  $P_{rm}$  = power of rotating motor, kW;  $t$  = drying time, s;  $\eta_{rm}$  = efficiency of motor, 0.9.

### 1.5 Energy requirement of water pump

Microwave generator used in current study was a water cooled system. So there was a water pump to regulate the cold water in the system. Energy consumed by that pump  $E_5$  was calculated using equation 10:

$$E_5 = \frac{P_{wp} t}{\eta_{wp}} \quad (10)$$

Where,  $P_{wp}$  = power of water pump, kW;  $t$  = drying time, s;  $\eta_{wp}$  = efficiency of water pump, 0.9

By calculating energies required by individual parts in the system through the drying time and total moisture removed, specific energy values were calculated.

**Table A1** Specific Energy Consumption in Microwave-Convective Drying of Okra

| Process Variables |                |                |                               | Drying Time (min) | E1 (kJ) | E2 (kJ) | E3 (kJ) | E4 (kJ) | E5 (kJ) | Total Energy (kJ) | Specific Energy (MJ/kg) |
|-------------------|----------------|----------------|-------------------------------|-------------------|---------|---------|---------|---------|---------|-------------------|-------------------------|
| Air Speed (m/s)   | Air Temp. (°C) | MW Power (W/g) | Flow Rate (m <sup>3</sup> /s) |                   |         |         |         |         |         |                   |                         |
| 1.8               | 63.9           | 2.1            | 0.0142                        | 60                | 2140.4  | 1080    | 1512    | 14.0    | 100.0   | 4846.4            | 55.26                   |
| 1.8               | 63.9           | 0.9            | 0.0142                        | 130               | 4637.5  | 2340    | 1404    | 30.3    | 216.7   | 8628.5            | 98.16                   |
| 1.8               | 46.1           | 2.1            | 0.0142                        | 75                | 1134.3  | 1350    | 1890    | 17.5    | 125.0   | 4516.8            | 51.50                   |
| 1.8               | 46.1           | 0.9            | 0.0142                        | 175               | 2646.6  | 3150    | 1890    | 40.8    | 291.7   | 8019.1            | 91.23                   |
| 1.2               | 63.9           | 2.1            | 0.0095                        | 55                | 1308.0  | 990     | 1386    | 12.8    | 91.7    | 3788.5            | 43.19                   |
| 1.2               | 63.9           | 0.9            | 0.0095                        | 130               | 3091.7  | 2340    | 1404    | 30.3    | 216.7   | 7082.7            | 80.67                   |
| 1.2               | 46.1           | 2.1            | 0.0095                        | 70                | 705.8   | 1260    | 1764    | 16.3    | 116.7   | 3862.8            | 43.95                   |
| 1.2               | 46.1           | 0.9            | 0.0095                        | 165               | 1663.6  | 2970    | 1782    | 38.5    | 275.0   | 6729.1            | 76.73                   |
| 2                 | 55             | 1.5            | 0.0158                        | 110               | 3104.2  | 1980    | 1980    | 25.7    | 183.3   | 7273.2            | 82.65                   |
| 1                 | 55             | 1.5            | 0.0079                        | 95                | 1340.5  | 1710    | 1710    | 22.2    | 158.3   | 4941.0            | 56.34                   |
| 1.5               | 70             | 1.5            | 0.0118                        | 85                | 3025.7  | 1530    | 1530    | 19.8    | 141.7   | 6247.2            | 71.23                   |
| 1.5               | 40             | 1.5            | 0.0118                        | 120               | 808.1   | 2160    | 2160    | 28.0    | 200.0   | 5356.1            | 61.14                   |
| 1.5               | 55             | 2.5            | 0.0118                        | 50                | 1058.3  | 900     | 1500    | 11.7    | 83.3    | 3553.3            | 40.51                   |
| 1.5               | 55             | 0.5            | 0.0118                        | 180               | 3809.7  | 3240    | 1080    | 42.0    | 300.0   | 8471.7            | 96.6                    |
| 1.5               | 55             | 1.5            | 0.0118                        | 100               | 2116.5  | 1800    | 1800    | 23.3    | 166.7   | 5906.5            | 67.35                   |
| 1.5               | 55             | 1.5            | 0.0118                        | 105               | 2222.3  | 1890    | 1890    | 24.5    | 175.0   | 6201.8            | 70.56                   |
| 1.5               | 55             | 1.5            | 0.0118                        | 100               | 2116.5  | 1800    | 1800    | 23.3    | 166.7   | 5906.5            | 67.35                   |
| 1.5               | 55             | 1.5            | 0.0118                        | 105               | 2222.3  | 1890    | 1890    | 24.5    | 175.0   | 6201.8            | 70.71                   |
| 1.5               | 55             | 1.5            | 0.0118                        | 100               | 2116.5  | 1800    | 1800    | 23.3    | 166.7   | 5906.5            | 67.35                   |
| 1.5               | 55             | 1.5            | 0.0118                        | 100               | 2116.5  | 1800    | 1800    | 23.3    | 166.7   | 5906.5            | 67.2                    |

**Table A2** Color parameter values of okra dried under various drying conditions

| Process Variables  |                |                | L     | a     | b    | $\Delta E$ |
|--------------------|----------------|----------------|-------|-------|------|------------|
| Air velocity (m/s) | Air Temp. (°C) | MW Power (W/g) |       |       |      |            |
| 1.8 (+1)           | 63.9 (+1)      | 2.1 (+1)       | 20.29 | -0.12 | 4.03 | 29.56      |
| 1.8 (+1)           | 63.9 (+1)      | 0.9 (-1)       | 21.42 | 0.1   | 3.79 | 29.24      |
| 1.8 (+1)           | 46.1 (-1)      | 2.1 (+1)       | 22.46 | -1.96 | 4.34 | 27.13      |

|            |             |              |       |       |      |       |
|------------|-------------|--------------|-------|-------|------|-------|
| 1.8 (+1)   | 46.1 (-1)   | 0.9 (-1)     | 24.23 | -2.42 | 4.21 | 26.07 |
| 1.2 (-1)   | 63.9 (+1)   | 2.1 (+1)     | 20.45 | -0.56 | 5.32 | 28.47 |
| 1.2 (-1)   | 63.9 (+1)   | 0.9 (-1)     | 21.71 | 0.16  | 3.92 | 29.06 |
| 1.2 (-1)   | 46.1 (-1)   | 2.1 (+1)     | 21.36 | -2.05 | 4.51 | 27.55 |
| 1.2 (-1)   | 46.1 (-1)   | 0.9 (-1)     | 23.28 | -0.12 | 4.85 | 27.56 |
| 2 (+1.682) | 55 (0)      | 1.5 (0)      | 22.94 | 0.2   | 2.92 | 29.11 |
| 1 (-1.682) | 55 (0)      | 1.5 (0)      | 23.21 | 0.3   | 3.09 | 28.94 |
| 1.5 (0)    | 70 (+1.682) | 1.5 (0)      | 21.37 | 0.07  | 3.48 | 29.44 |
| 1.5 (0)    | 40 (-1.682) | 1.5 (0)      | 22.58 | -0.33 | 4.68 | 27.86 |
| 1.5 (0)    | 55 (0)      | 2.5 (+1.682) | 22.26 | -0.85 | 3.63 | 28.34 |
| 1.5 (0)    | 55 (0)      | 0.5 (-1.682) | 23.65 | -3.15 | 4.02 | 26.04 |
| 1.5 (0)    | 55 (0)      | 1.5 (0)      | 26.23 | -2.12 | 3.29 | 26.02 |
| 1.5 (0)    | 55 (0)      | 1.5 (0)      | 25.58 | -2.45 | 3.45 | 25.97 |
| 1.5 (0)    | 55 (0)      | 1.5 (0)      | 25.98 | -2.02 | 3.14 | 26.29 |
| 1.5 (0)    | 55 (0)      | 1.5 (0)      | 26.01 | -2.61 | 3.1  | 25.94 |
| 1.5 (0)    | 55 (0)      | 1.5 (0)      | 26.25 | -2.17 | 3.39 | 25.92 |
| 1.5 (0)    | 55 (0)      | 1.5 (0)      | 25.72 | -1.98 | 3.16 | 26.40 |

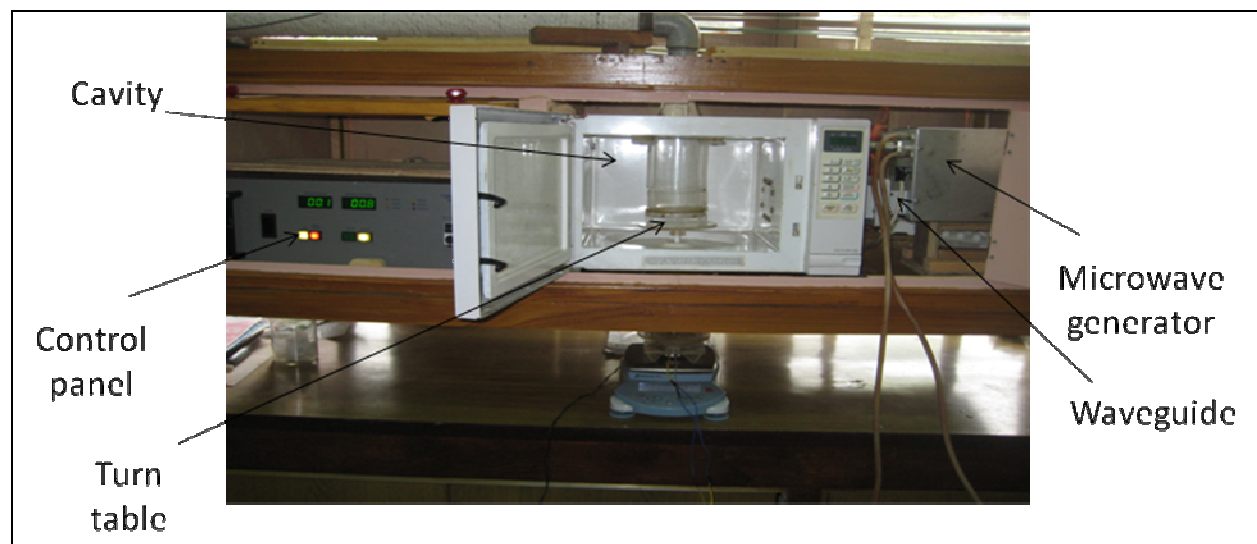

**Fig. 6** Microwave heating system

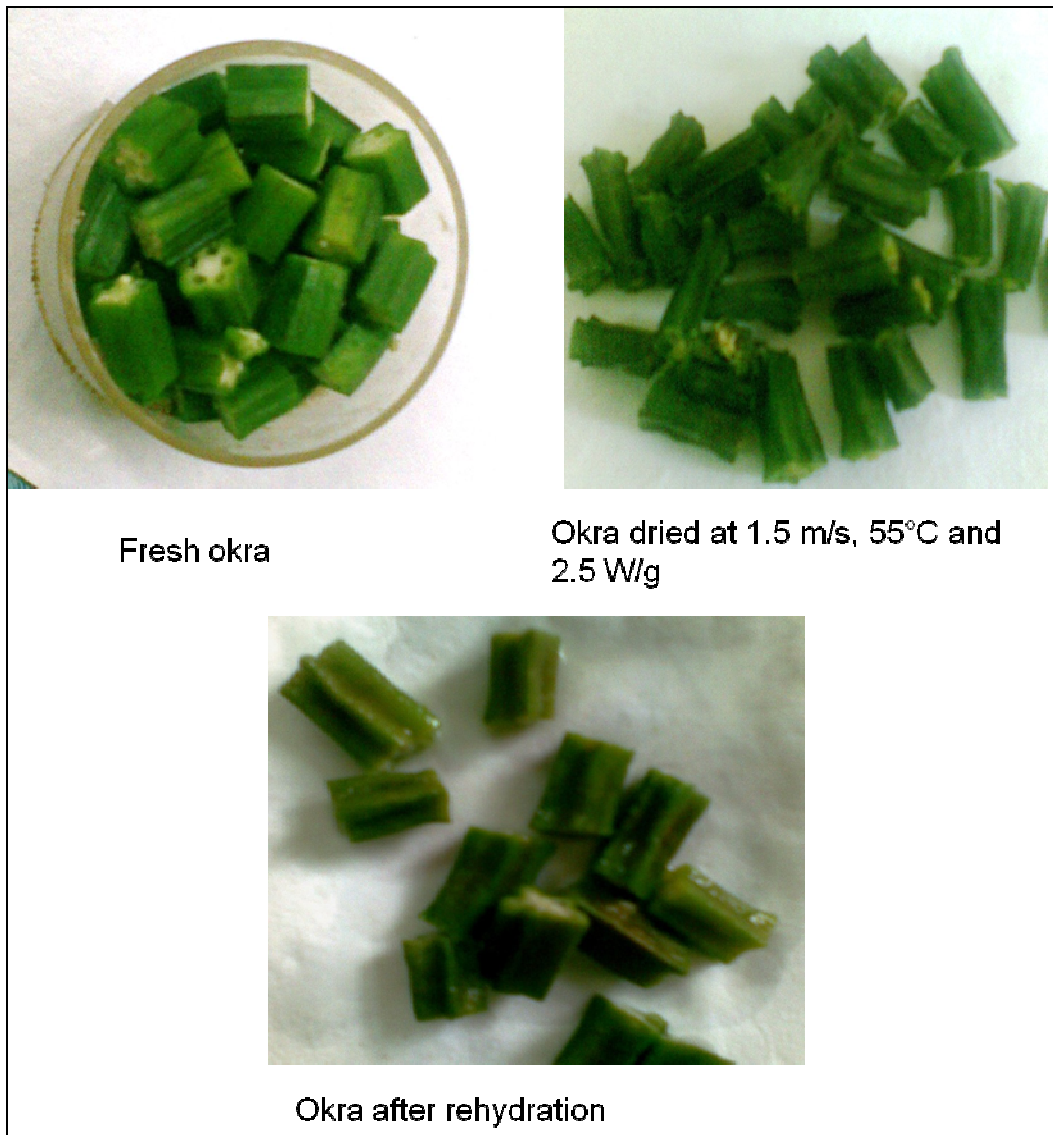

**Fig. 7** Appearance of okra after microwave-convective drying and rehydration

## References

- Kumar D (2009) Studies on Microwave-Convective drying of okra. M.Tech Thesis, Kharagpur: Indian Institute of Technology, Kharagpur, Agricultural and Food Engineering Department.
- Sharma GP (2000). Microwave convective drying of garlic cloves. PhD Thesis, Kharagpur: Indian Institute of Technology, Kharagpur, Agricultural and Food Engineering Department.
- Sharma GP and Prasad S (2005) Specific energy consumption in microwave drying of garlic cloves. *Energy* 31: 1921–1926.
